# Supplementary material for: Biological and chemical insight into Gaultheria procumbens fruits: a rich source of anti-inflammatory and antioxidant salicylate glycosides and procyanidins for food and functional application
Source: Royal Society of Chemistry journal article supplement (doi:10.1039/d0fo01750g), 2020-01-01
Supplement: d0fo01750g1.pdf [file d0fo01750g1.pdf]

# Biological and chemical insight into *Gaultheria procumbens* fruits: A rich source of anti-inflammatory and antioxidant salicylate glycosides and procyanidins for food and functional application

Piotr Michel,<sup>a\*</sup> Sebastian Granica,<sup>b</sup> Karolina Rosińska,<sup>a</sup> Jarosław Rojek,<sup>a</sup> Łukasz Poraj,<sup>a</sup> Monika Anna Olszewska<sup>a</sup>

<sup>a</sup> Department of Pharmacognosy, Faculty of Pharmacy, Medical University of Lodz, Muszynskiego 1 St., 90-151 Lodz, Poland

<sup>b</sup> Department of Pharmacognosy and Molecular Basis of Phytotherapy, Faculty of Pharmacy, Warsaw Medical University, 1 Banacha St., Warsaw 02-097, Poland

\* Corresponding author. *E-mail address*: piotr.michel@umed.lodz.pl

## Supplementary Materials

### Table of contents

**Table S1** Phenolic analytes detected in *G. procumbens* fruit dry extracts by UHPLC-PDA-ESI-MS<sup>3</sup>

**Table S2** NMR spectral data of **PH**, **GT** and **TG** in methanol-*d*<sub>4</sub> (600 MHz for <sup>1</sup>H and 150.9 MHz for <sup>13</sup>C)

**Table S3** Correlation (*r*) coefficients and probability (*p*) values of linear relationships between antioxidant and anti-inflammatory activity parameters and phenolic contents of *G. procumbens* fruit dry extracts

**Table S4** Extraction yield and phenolic contents including the levels of individual methyl salicylate glycosides (**GT**, **PH** and **TG**) in *G. procumbens* fruits extracted with different solvents

**Fig. S1** UHPLC-PDA chromatogram of *n*-butanol extract of *G. procumbens* fruits (**BE**) at 280 nm.

**Fig. S2** Effect of acetone fruit extract (**AE**) at 25, 50, 100, 150 µg/mL and the isolated salicylates (**PH**, **GT** and **TG**) at 25, 50, and 75 µM on viability (membrane integrity) of neutrophils as indicated by propidium iodide positive PI(+) cells.

**Fig. S3** Effect of the isolated salicylates (**TG**, **GT** and **PH**) and positive controls (**QU** and **DEX**) at 25, 50, and 75 µM on: (A) ROS production, and secretion of (B) TNF-α, (C) IL-1β, (D) IL-8, (E) MMP-9, and (F) ELA-2 by stimulated human neutrophils.

**Table S1** Phenolic analytes detected in *G. procumbens* fruit dry extracts by UHPLC-PDA-ESI-MS<sup>3</sup>

| Peak | Analytes                                                                                                                                     | Rt [min] | UV [nm]  | [M-H] <sup>-</sup> m/z | MS <sup>2</sup> (% relative abundance)                                       | MS <sup>3</sup> (% relative abundance)           | Extract         |
|------|----------------------------------------------------------------------------------------------------------------------------------------------|----------|----------|------------------------|------------------------------------------------------------------------------|--------------------------------------------------|-----------------|
| 1    | unknown compound                                                                                                                             | 3.1      | 285      | 465                    | 447 (7); <b>367 (100)</b>                                                    | 349 (29); 187 (71); 179 (90); 143 (32); 113 (21) | All             |
| 2    | protocatechuic acid *                                                                                                                        | 4.2      | 259, 293 | 153                    |                                                                              |                                                  | All             |
| 3    | vanilic acid derivative                                                                                                                      | 5.3      | 260, 310 | 331                    | <b>313 (100)</b> ; 211 (2); 167 (33); 125 (7)                                | 297 (16), 153 (100)                              | ME, WE          |
| 4    | 3- <i>O</i> -caffeoylquinic acid (neochlorogenic acid) *                                                                                     | 6.0      | 325      | 353                    | 191 (100); 179 (29)                                                          |                                                  | All             |
| 5    | <i>p</i> -hydroxybenzoic acid *                                                                                                              | 7.0      | 254      | 137                    | 93 (100)                                                                     |                                                  | All             |
| 6    | unknown compound                                                                                                                             | 8.8      | 280      | 293                    | 273 (3); 195 (9); 131 (100)                                                  |                                                  | All             |
| 7    | procyanidin B-type dimer                                                                                                                     | 10.1     | 280      | 577                    | <b>425 (100)</b> ; 407 (64); 289 (20)                                        | 407 (100); 273 (10)                              | AE, ME, WE      |
| 8    | procyanidin B-type dimer                                                                                                                     | 10.5     | 280      | 577                    | <b>425 (100)</b> ; 407 (63); 289 (20)                                        | 407 (100); 273 (9)                               | All             |
| 9    | 5- <i>O</i> -caffeoylquinic acid (chlorogenic acid) *                                                                                        | 10.9     | 325      | 353                    | 191 (100); 179 (6)                                                           |                                                  | All             |
| 10   | (+)-catechin *                                                                                                                               | 11.1     | 280      | 289                    | 245 (100); 205 (27)                                                          |                                                  | All             |
| 11   | methyl salicylate 2- <i>O</i> -(2'- <i>O</i> -β-D-glucopyranosyl)-β-D-glucopyranoside (physanguloside A, <b>PH</b> ) *                       | 11.3     | 285      | 521 <sup>a</sup>       | 475 (100); 443 (4)                                                           |                                                  | All             |
| 12   | sinapic acid hexoside derivative                                                                                                             | 12.1     | 280      | 431                    | 413 (5); 385 (100); 223 (13)                                                 |                                                  | All             |
| 13   | caffeic acid derivative                                                                                                                      | 12.4     | 325      | 327                    | 309 (6); 179 (49); 147 (100); 119 (16)                                       |                                                  | All             |
| 14   | methyl salicylate 2- <i>O</i> -(2'- <i>O</i> -β-D-glucopyranosyl-6'- <i>O</i> -β-D-xylopyranosyl)-β-D-glucopyranoside (MSTG-B, <b>TG</b> ) * | 13.0     | 285      | 653 <sup>a</sup>       | 607 (100); 575 (13)                                                          |                                                  | All             |
| 15   | procyanidin B-type trimer                                                                                                                    | 13.6     | 280      | 865                    | 847 (31); 739 (43); <b>713 (34)</b> ; 695 (79); 577 (47); 451 (20); 287 (20) | 695 (100); 575 (5); 561 (23); 407 (36); 243 (11) | AE, ME, WE      |
| 16   | procyanidin B-type dimer                                                                                                                     | 14.1     | 280      | 577                    | <b>425 (100)</b> ; 407 (64); 289 (22)                                        | 407 (100); 273 (8)                               | All             |
| 17   | procyanidin B-type dimer                                                                                                                     | 14.6     | 280      | 577                    | <b>425 (100)</b> ; 407 (59); 289 (18)                                        | 407 (100); 273 (10)                              | ME, WE          |
| 18   | procyanidin B-2 ( <b>PB2</b> ) *                                                                                                             | 15.3     | 280      | 577                    | <b>425 (100)</b> ; 407 (41); 289 (14)                                        | 407 (100); 273 (7)                               | AE, ME, WE      |
| 19   | unknown compound                                                                                                                             | 15.7     | 280      | 461                    | <b>415 (100)</b>                                                             | 407 (100); 381 (4); 273 (7)                      | AE, ME, BE, WE  |
| 20   | protocatechuic acid derivative                                                                                                               | 16.1     | 259, 293 | 481                    | 463 (17); 345 (39); 327 (100); 165 (18); 153 (56)                            |                                                  | All             |
| 21   | (-)-epicatechin *                                                                                                                            | 16.8     | 280      | 289                    | 245 (100); 205 (16)                                                          |                                                  | AE, ME, EAE, WE |
| 22   | gaultherin ( <b>GT</b> ) *                                                                                                                   | 17.7     | 285      | 491 <sup>a</sup>       | 445 (12); 413 (4); 293 (100); 233 (2); 149 (4)                               |                                                  | All             |
| 23   | unknown compound                                                                                                                             | 17.9     | 280      | 367                    | 245 (12); 203 (61); 185 (100); 141 (26)                                      |                                                  | ME, WE          |

Table S1 (Contd.)

| Peak | Analytes                                              | Rt [min] | UV [nm]  | [M-H] <sup>-</sup> m/z | MS <sup>2</sup> (% relative abundance)                                        | MS <sup>3</sup> (% relative abundance)                     | Extract        |
|------|-------------------------------------------------------|----------|----------|------------------------|-------------------------------------------------------------------------------|------------------------------------------------------------|----------------|
| 24   | procyanidin A-type trimer                             | 18.3     | 280      | 863                    | <b>711 (100)</b> ; 573 (21); 559 (21); 451 (25); 411 (31); 289 (10)           | 693 (78); 559 (21); 541 (26); 407 (14)                     | AE, ME, WE     |
| 25   | procyanidin B-type dimer                              | 18.7     | 280      | 577                    | <b>425 (100)</b> ; 407 (20); 289 (49)                                         | 407 (100); 273 (11)                                        | AE, ME, WE     |
| 26   | procyanidin A-type trimer                             | 20.3     | 280      | 863                    | <b>711 (100)</b> ; 693 (8); 573 (27); 559 (22); 451 (43); 411 (34); 289 (22)  | 693 (100); 559 (82); 541 (24); 463 (13); 407 (18); 285 (3) | AE, ME, WE     |
| 27   | procyanidin B-type trimer                             | 20.7     | 280      | 865                    | 847 (14); 739 (18); <b>713 (100)</b> ; 695 (32); 577 (29); 451 (27); 287 (17) | 695 (100); 575 (22); 561 (22); 407 (20); 243 (10)          | AE, ME, WE     |
| 28   | procyanidin C1 *                                      | 21.3     | 280      | 865                    | 847 (16); 739 (56); <b>713 (100)</b> ; 695 (49); 577 (61); 451 (36); 287 (35) | 695 (100); 575 (23); 561 (19); 407 (35); 243 (7)           | AE, ME, WE     |
| 29   | procyanidin B-type dimer                              | 22.1     | 280      | 577                    | <b>425 (100)</b> ; 407 (62); 289 (19)                                         | 407 (100); 273 (12)                                        | AE, ME, WE     |
| 30   | procyanidin A-type dimer                              | 22.6     | 280      | 575                    | 499 (98); 491 (54); 451 (14); <b>425 (100)</b> ; 407 (79); 289 (22)           | 407 (100); 273 (9)                                         | All            |
| 31   | procyanidin B-type trimer                             | 23.6     | 280      | 865                    | 847 (6); 739 (36); <b>713 (51)</b> ; 695 (92); 577 (99); 451 (30); 287 (54)   | 695 (100); 575 (24); 561 (26); 407 (25); 243 (10)          | AE, ME, WE     |
| 32   | procyanidin A-type dimer                              | 24.2     | 280      | 575                    | 499 (27); 449 (89); <b>423 (41)</b> ; 289 (79)                                | 405 (17); 285 (100)                                        | ME, WE         |
| 33   | procyanidin A-type dimer                              | 24.8     | 280      | 575                    | 499 (25); 449 (49); <b>423 (100)</b> ; 289 (20)                               | 405 (11); 285 (100)                                        | WE             |
| 34   | procyanidin A-type trimer                             | 25.7     | 280      | 863                    | <b>711 (100)</b> ; 693 (20); 573 (24); 559 (23); 451 (32); 411 (42); 289 (12) | 693 (96); 559 (100); 541 (64); 463 (5); 407 (15); 285 (2)  | All            |
| 35   | quercetin 3-O-β-D-galactopyranoside (hyperoside) *    | 27.6     | 254, 353 | 463                    | <b>301 (100)</b>                                                              | 273 (38); 255 (20); 179 (100); 151 (64)                    | All            |
| 36   | quercetin 3-O-β-D-glucopyranoside (isoquercitrin) *   | 28.6     | 256, 353 | 463                    | <b>301 (100)</b>                                                              | 273 (54); 255 (22); 179 (100); 151 (76)                    | ME, WE         |
| 37   | quercetin 3-O-β-D-glucuronopyranoside (miquelianin) * | 29.1     | 256, 356 | 477                    | <b>301 (100)</b>                                                              | 273 (29); 257 (19); 179 (100); 151 (58)                    | AE, ME, WE     |
| 38   | procyanidin A-type dimer                              | 29.5     | 280      | 575                    | 449 (56); <b>423 (100)</b> ; 289 (19)                                         | 405 (8); 285 (100); 257 (5)                                | AE, ME, WE     |
| 39   | quercetin hexoside-rhamnoside                         | 31.8     | 256, 355 | 609                    | <b>447 (100)</b> ; 301 (26)                                                   | 301 (100)                                                  | WE             |
| 40   | quercetin 3-O-α-L-rhamnopyranoside (quercitrin) *     | 32.9     | 276, 350 | 447                    | <b>301 (100)</b>                                                              | 273 (19); 257 (23); 179 (100); 151 (59)                    | WE             |
| 41   | kaempferol 3-O-β-D-glucuronopyranoside *              | 33.3     | 265, 345 | 461                    | <b>285 (100)</b>                                                              | 267 (32); 257 (100); 241 (23); 229 (30); 151 (16)          | ME, WE         |
| 42   | unknown compound                                      | 40.3     | 325      | 663                    | 517 (5); <b>487 (100)</b> ; 469 (14)                                          | 341 (8); 307 (100); 235 (57); 205 (15); 163 (74)           | ME, WE         |
| 43   | unknown compound                                      | 41.5     | 325      | 693                    | <b>517 (100)</b> ; 499 (63); 337 (12); 265 (4)                                | 337 (90); 295 (9); 265 (36); 235 (52); 193 (100); 175 (58) | AE, ME, BE, WE |
| 44   | quercetin *                                           | 43.7     | 255, 364 | 301                    | 273 (36); 255 (21); 179 (100); 151 (69)                                       |                                                            | All            |
| 45   | kaempferol *                                          | 50.4     | 265, 364 | 285                    | 267 (90); 257 (11); 241 (20); 229 (80); 151 (18)                              |                                                            | All            |

Rt, retention times. UV  $\lambda_{max}$ , absorbance maxima in PDA spectra. [M-H]<sup>-</sup>, pseudomolecular ions in MS spectra recorded in a negative ion mode. The bolded ions were subjected to MS<sup>3</sup> fragmentation. Compounds marked with an asterisk (\*) were identified with authentic standards; <sup>a</sup> [M+HCOO]<sup>-</sup>.

**Table S2** NMR spectral data of **PH**, **GT** and **TG** in methanol-*d*<sub>4</sub> (600 MHz for <sup>1</sup>H and 150.9 MHz for <sup>13</sup>C) <sup>a</sup>

| Pos. <sup>b</sup> | PH                                                                  | GT                  |                                                                      | TG                  |                                                                      |                     |
|-------------------|---------------------------------------------------------------------|---------------------|----------------------------------------------------------------------|---------------------|----------------------------------------------------------------------|---------------------|
|                   | $\delta_{\text{H}}$                                                 | $\delta_{\text{C}}$ | $\delta_{\text{H}}$                                                  | $\delta_{\text{C}}$ | $\delta_{\text{H}}$                                                  | $\delta_{\text{C}}$ |
| 1                 |                                                                     | 120.1               |                                                                      | 121.0               |                                                                      | 120.0               |
| 2                 |                                                                     | 156.2               |                                                                      | 157.2               |                                                                      | 156.1               |
| 3                 | 7.28 (1H, <i>dd</i> , $J_1=0.8$ , $J_2=8.7$ )                       | 114.9               | 7.47 (1H, <i>dd</i> , $J_1=1.1$ , $J_2=7.9$ )                        | 117.8               | 7.34 (1H, <i>dd</i> , $J_1=1.5$ , $J_2=8.7$ )                        | 115.3               |
| 4                 | 7.54 (1H, <i>ddd</i> , $J_1=1.5$ , $J_2=7.2$ , $J_3=8.7$ )          | 133.4               | 7.59 (1H, <i>ddd</i> , $J_1=1.9$ , $J_2=7.9$ , $J_3=7.9$ )           | 133.9               | 7.57 (1H, <i>ddd</i> , $J_1=1.9$ , $J_2=7.5$ , $J_3=8.7$ )           | 133.7               |
| 5                 | 7.09 (1H, <i>ddd</i> , $J_1=0.8$ , $J_2=7.2$ , $J_3=7.9$ )          | 121.1               | 7.15 (1H, <i>ddd</i> , $J_1=1.1$ , $J_2=7.9$ , $J_3=7.9$ )           | 122.3               | 7.09 (1H, <i>ddd</i> , $J_1=1.5$ , $J_2=7.5$ , $J_3=8.7$ )           | 121.2               |
| 6                 | 7.79 (1H, <i>dd</i> , $J_1=1.5$ , $J_2=7.9$ )                       | 130.9               | 7.79 (1H, <i>dd</i> , $J_1=1.9$ , $J_2=7.9$ )                        | 130.6               | 7.79 (1H, <i>dd</i> , $J_1=1.9$ , $J_2=7.5$ )                        | 130.9               |
| 7                 |                                                                     | 166.6               |                                                                      | 167.2               |                                                                      | 166.5               |
| 8                 | 3.90 (3H, <i>s</i> )                                                | 51.2                | 3.92 (3H, <i>s</i> )                                                 | 51.4                | 3.90 (3H, <i>s</i> )                                                 | 51.2                |
|                   | 2- $\beta$ -D-glucopyranosyl:                                       |                     | 2- $\beta$ -D-glucopyranosyl:                                        |                     | 2- $\beta$ -D-glucopyranosyl:                                        |                     |
| 1'                | 5.36 (1H, <i>d</i> , $J=7.5$ )                                      | 98.3                | 4.90 (1H, <i>d</i> , $J=7.5$ )                                       | 102.5               | 5.33 (1H, <i>d</i> , $J=7.5$ )                                       | 98.3                |
| 2'                | 3.82 (1H, <i>dd</i> , $J_1=7.5$ , $J_2=9.0$ )                       | 81.6                | 3.56 (1H, <i>dd</i> , $J_1=7.5$ , $J_2=9.0$ )                        | 73.6                | 3.83 (1H, <i>dd</i> , $J_1=7.5$ , $J_2=9.0$ )                        | 81.6                |
| 3'                | 3.71 (1H, <i>dd</i> , $J_1=9.0$ , $J_2=9.8$ )                       | 76.3                | 3.50 (1H, <i>dd</i> , $J_1=9.0$ , $J_2=9.8$ )                        | 76.2                | 3.70 (1H, <i>dd</i> , $J_1=9.0$ , $J_2=9.8$ )                        | 76.2                |
| 4'                | 3.54 (1H, <i>dd</i> , $J_1=9.0$ , $J_2=9.8$ )                       | 69.5                | 3.43 (1H, <i>dd</i> , $J_1=9.8$ , $J_2=9.8$ )                        | 69.9                | 3.86 (1H, <i>dd</i> , $J_1=9.0$ , $J_2=9.8$ )                        | 69.6                |
| 5'                | 3.52 (1H, <i>ddd</i> , $J_1=1.5$ , $J_2=6.4$ , $J_3=9.0$ )          | 76.5                | 3.69 (1H, <i>ddd</i> , $J_1=1.9$ , $J_2=6.4$ , $J_3=9.8$ )           | 76.1                | 3.49 (1H, <i>ddd</i> , $J_1=1.5$ , $J_2=6.4$ , $J_3=9.0$ )           | 75.8                |
|                   | 3.88 (1H, <i>dd</i> , $J_1=1.5$ , $J_2=11.7$ , H-6' <sub>a</sub> )  |                     | 4.16 (1H, <i>dd</i> , $J_1=1.9$ , $J_2=11.7$ , H-6' <sub>a</sub> )   |                     | 4.12 (1H, <i>dd</i> , $J_1=1.5$ , $J_2=11.7$ , H-6' <sub>a</sub> )   |                     |
| 6'                | 3.73 (1H, <i>dd</i> , $J_1=6.4$ , $J_2=11.7$ , H-6' <sub>b</sub> )  | 61.0                | 3.81 (1H, <i>dd</i> , $J_1=6.4$ , $J_2=11.7$ , H-6' <sub>b</sub> )   | 68.5                | 3.81 (1H, <i>dd</i> , $J_1=6.4$ , $J_2=11.7$ , H-6' <sub>b</sub> )   | 68.3                |
|                   | 2'- $\beta$ -D-glucopyranosyl:                                      |                     | 6'- $\beta$ -D-xylopyranosyl:                                        |                     | 6'- $\beta$ -D-xylopyranosyl:                                        |                     |
| 1''               | 4.84 (1H, <i>d</i> , $J=7.5$ )                                      | 103.0               | 4.36 (1H, <i>d</i> , $J=7.5$ )                                       | 104.1               | 4.31 (1H, <i>d</i> , $J=7.5$ )                                       | 103.9               |
| 2''               | 3.25 (1H, <i>dd</i> , $J_1=7.5$ , $J_2=9.4$ )                       | 74.7                | 3.24 (1H, <i>dd</i> , $J_1=7.5$ , $J_2=9.0$ )                        | 73.6                | 3.21 (1H, <i>dd</i> , $J_1=7.5$ , $J_2=9.0$ )                        | 73.6                |
| 3''               | 3.41 (1H, <i>dd</i> , $J_1=9.0$ , $J_2=9.4$ )                       | 76.3                | 3.31 (1H, <i>dd</i> , $J_1=9.0$ , $J_2=9.8$ )                        | 76.3                | 3.28 (1H, <i>dd</i> , $J_1=8.7$ , $J_2=9.0$ )                        | 76.2                |
| 4''               | 3.40 (1H, <i>dd</i> , $J_1=8.3$ , $J_2=9.0$ )                       | 69.4                | 3.52 (1H, <i>ddd</i> , $J_1=5.3$ , $J_2=9.8$ , $J_3=10.2$ )          | 69.8                | 3.48 (1H, <i>ddd</i> , $J_1=5.3$ , $J_2=9.0$ , $J_3=10.5$ )          | 69.8                |
| 5''               | 3.17 (1H, <i>ddd</i> , $J_1=2.3$ , $J_2=6.4$ , $J_3=8.3$ )          | 76.0                | 3.18 (1H, <i>dd</i> , $J_1=10.2$ , $J_2=11.7$ , H-5'' <sub>a</sub> ) |                     | 3.11 (1H, <i>dd</i> , $J_1=10.5$ , $J_2=11.3$ , H-5'' <sub>a</sub> ) |                     |
|                   | 3.57 (1H, <i>dd</i> , $J_1=2.3$ , $J_2=11.7$ , H-6'' <sub>a</sub> ) |                     | 3.87 (1H, <i>dd</i> , $J_1=5.3$ , $J_2=11.7$ , H-5'' <sub>e</sub> )  | 65.5                | 3.82 (1H, <i>dd</i> , $J_1=5.3$ , $J_2=11.3$ , H-5'' <sub>e</sub> )  | 65.5                |
| 6''               | 3.22 (1H, <i>dd</i> , $J_1=6.4$ , $J_2=11.7$ , H-6'' <sub>b</sub> ) | 60.3                |                                                                      |                     |                                                                      |                     |
|                   |                                                                     |                     |                                                                      |                     | 2'- $\beta$ -D-glucopyranosyl:                                       |                     |
| 1'''              |                                                                     |                     |                                                                      |                     | 4.85 (1H, <i>d</i> , $J=7.5$ )                                       | 103.0               |
| 2'''              |                                                                     |                     |                                                                      |                     | 3.25 (1H, <i>dd</i> , $J_1=7.5$ , $J_2=7.9$ )                        | 74.7                |
| 3'''              |                                                                     |                     |                                                                      |                     | 3.42 (1H, <i>dd</i> , $J_1=7.9$ , $J_2=9.0$ )                        | 76.0                |
| 4'''              |                                                                     |                     |                                                                      |                     | 3.40 (1H, <i>dd</i> , $J_1=9.0$ , $J_2=9.0$ )                        | 69.4                |
| 5'''              |                                                                     |                     |                                                                      |                     | 3.17 (1H, <i>ddd</i> , $J_1=1.1$ , $J_2=6.4$ , $J_3=9.0$ )           | 76.1                |
|                   |                                                                     |                     |                                                                      |                     | 3.52 (1H, <i>dd</i> , $J_1=1.1$ , $J_2=12.1$ , H-6''' <sub>a</sub> ) |                     |
| 6'''              |                                                                     |                     |                                                                      |                     | 3.23 (1H, <i>dd</i> , $J_1=6.4$ , $J_2=12.1$ , H-6''' <sub>b</sub> ) | 60.2                |

<sup>a</sup> Data acquired with TMS as the internal standard,  $\delta$  in ppm. Multiplicities and coupling constants (in Hz) are given in parentheses. Assignments confirmed by <sup>1</sup>H-<sup>1</sup>H COSY, HMQC, and HMBC experiments. <sup>b</sup> For trivial atom numbering see chemical formulas of **PH**, **GT** and **TG** (Fig. 2 of the main paper).

**Table S3** Correlation ( $r$ ) coefficients and probability ( $p$ ) values of linear relationships between antioxidant and anti-inflammatory activity parameters and phenolic contents of *G. procumbens* fruit dry extracts

| $r$ ( $p$ ) for: | Antioxidant activity |                   |                 |                              |                 |                               | Anti-inflammatory activity |                 |                   |
|------------------|----------------------|-------------------|-----------------|------------------------------|-----------------|-------------------------------|----------------------------|-----------------|-------------------|
|                  | DPPH                 | FRAP              | TBARS           | O <sub>2</sub> <sup>•-</sup> | •OH             | H <sub>2</sub> O <sub>2</sub> | COX-2                      | HYAL            | LOX               |
| TPC              | -0.8696 (0.130)      | 0.7930 (0.207)    | -0.8114 (0.189) | -0.7378 (0.262)              | 0.1976 (0.802)  | -0.5858 (0.414)               | -0.1391 (0.861)            | -0.8119 (0.188) | -0.5837 (0.416)   |
| TPH              | -0.3849 (0.615)      | 0.8807 (0.119)    | -0.3807 (0.619) | -0.4155 (0.585)              | -0.4449 (0.555) | -0.8594 (0.141)               | -0.8253 (0.175)            | -0.6946 (0.305) | -0.9331 (0.067)   |
| TPA              | -0.9042 (0.096)      | 0.8115 (0.188)    | -0.8532 (0.147) | -0.7878 (0.212)              | 0.2405 (0.759)  | -0.6345 (0.365)               | -0.1221 (0.878)            | -0.8516 (0.148) | -0.6229 (0.377)   |
| TLPA             | -0.7617 (0.238)      | 0.9939 (0.006) ** | -0.7469 (0.253) | -0.7506 (0.249)              | -0.0756 (0.924) | -0.9469 (0.053)               | -0.5443 (0.456)            | -0.9376 (0.062) | -0.9693 (0.031) * |
| TPHA             | 0.1530 (0.847)       | 0.2445 (0.756)    | 0.0826 (0.917)  | -0.0342 (0.917)              | -0.3246 (0.675) | -0.5059 (0.494)               | -0.5123 (0.488)            | -0.1682 (0.832) | -0.5275 (0.473)   |
| TSAL             | -0.3367 (0.663)      | 0.8553 (0.145)    | -0.3338 (0.666) | -0.3717 (0.628)              | -0.4801 (0.520) | -0.8374 (0.163)               | -0.8452 (0.155)            | -0.6572 (0.343) | -0.9158 (0.084)   |
| TFL              | -0.2752 (0.725)      | 0.6931 (0.307)    | -0.1843 (0.816) | -0.1050 (0.895)              | -0.5773 (0.423) | -0.3318 (0.668)               | -0.7156 (0.284)            | -0.3981 (0.602) | -0.4606 (0.539)   |

TPC: total phenolic content (Folin-Ciocalteu assay) in gallic acid equivalents, TPH: total phenolic content (HPLC), TSAL: total salicylates (HPLC), TPA: total proanthocyanidins (*n*-butanol/HCl assay) in cyanidin chloride equivalents, TLPA: total proanthocyanidins (HPLC), TPHA: total phenolic acids (HPLC), TFL: total flavonoids (HPLC). Asterisks mean significance of the estimated linear relationship (\* $p < 0.05$ , \*\*  $p < 0.01$ ) for four extracts ( $n = 4$ ).

**Table S4** Extraction yield and phenolic contents including the levels of individual methyl salicylate glycosides (**GT**, **PH** and **TG**) in *G. procumbens* fruits extracted with different solvents

|                    | Extraction solvent        |                |
|--------------------|---------------------------|----------------|
|                    | methanol-water (7:3, v/v) | water          |
| Yield <sup>a</sup> | 43.69 ± 2.47              | 48.09 ± 2.60   |
| TPC <sup>a</sup>   | 7.66 ± 0.12 *             | 4.93 ± 0.04 *  |
| TPC <sup>b</sup>   | 36.40 ± 0.53 *            | 23.43 ± 0.71 * |
| TPA <sup>b</sup>   | 28.49 ± 0.47 *            | 15.09 ± 0.16 * |
| TSAL <sup>b</sup>  | 38.21 ± 0.40 *            | 15.63 ± 0.30 * |
| TSA <sup>b</sup>   | 9.87 ± 0.10 *             | 3.57 ± 0.07 *  |
| GT <sup>b</sup>    | 22.33 ± 0.69 *            | 1.37 ± 0.02 *  |
| PH <sup>b</sup>    | 5.69 ± 0.19 *             | 3.91 ± 0.06 *  |
| TG <sup>b</sup>    | 10.19 ± 0.32              | 10.35 ± 0.37   |

Results are presented as means ± SD ( $n = 3$ ) and calculated per: <sup>a</sup> fresh fruit weight (mg/g fw); <sup>b</sup> dry fruit weight (mg/g dw). Means in the same row marked with asterisks differ significantly ( $p < 0.05$ ). TPC: total phenolic content (Folin-Ciocalteu assay) in gallic acid equivalents, TSAL: total salicylates (HPLC), TSA: total salicylates in equivalents of salicylic acid, TPA: total proanthocyanidins (*n*-butanol/HCl assay) in cyanidin chloride equivalents.

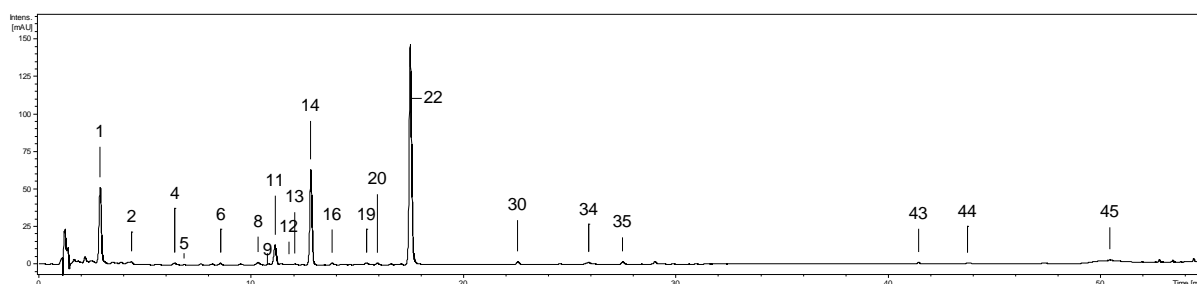

**Fig. S1** UHPLC-PDA chromatogram of *n*-butanol extract of *G. procumbens* fruits (**BE**) at 280 nm. The peak numbers refer to those implemented in Table S1. The following compounds were isolated: **PH** (peak 11), **TG** (peak 14) and **GT** (peak 22).

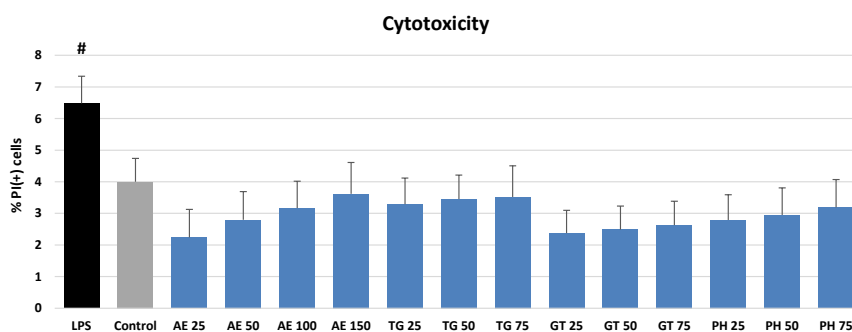

**Fig. S2** Effect of acetone fruit extract (**AE**) at 25, 50, 100, 150  $\mu\text{g}/\text{mL}$  and the isolated salicylates (**PH**, **GT** and **TG**) at 25, 50, and 75  $\mu\text{M}$  on viability (membrane integrity) of neutrophils as indicated by propidium iodide positive PI(+) cells. Data expressed as means ± SD of three independent experiments performed with cells isolated from five independent donors. Statistical significance: #  $p < 0.05$  compared to the non-stimulated control.

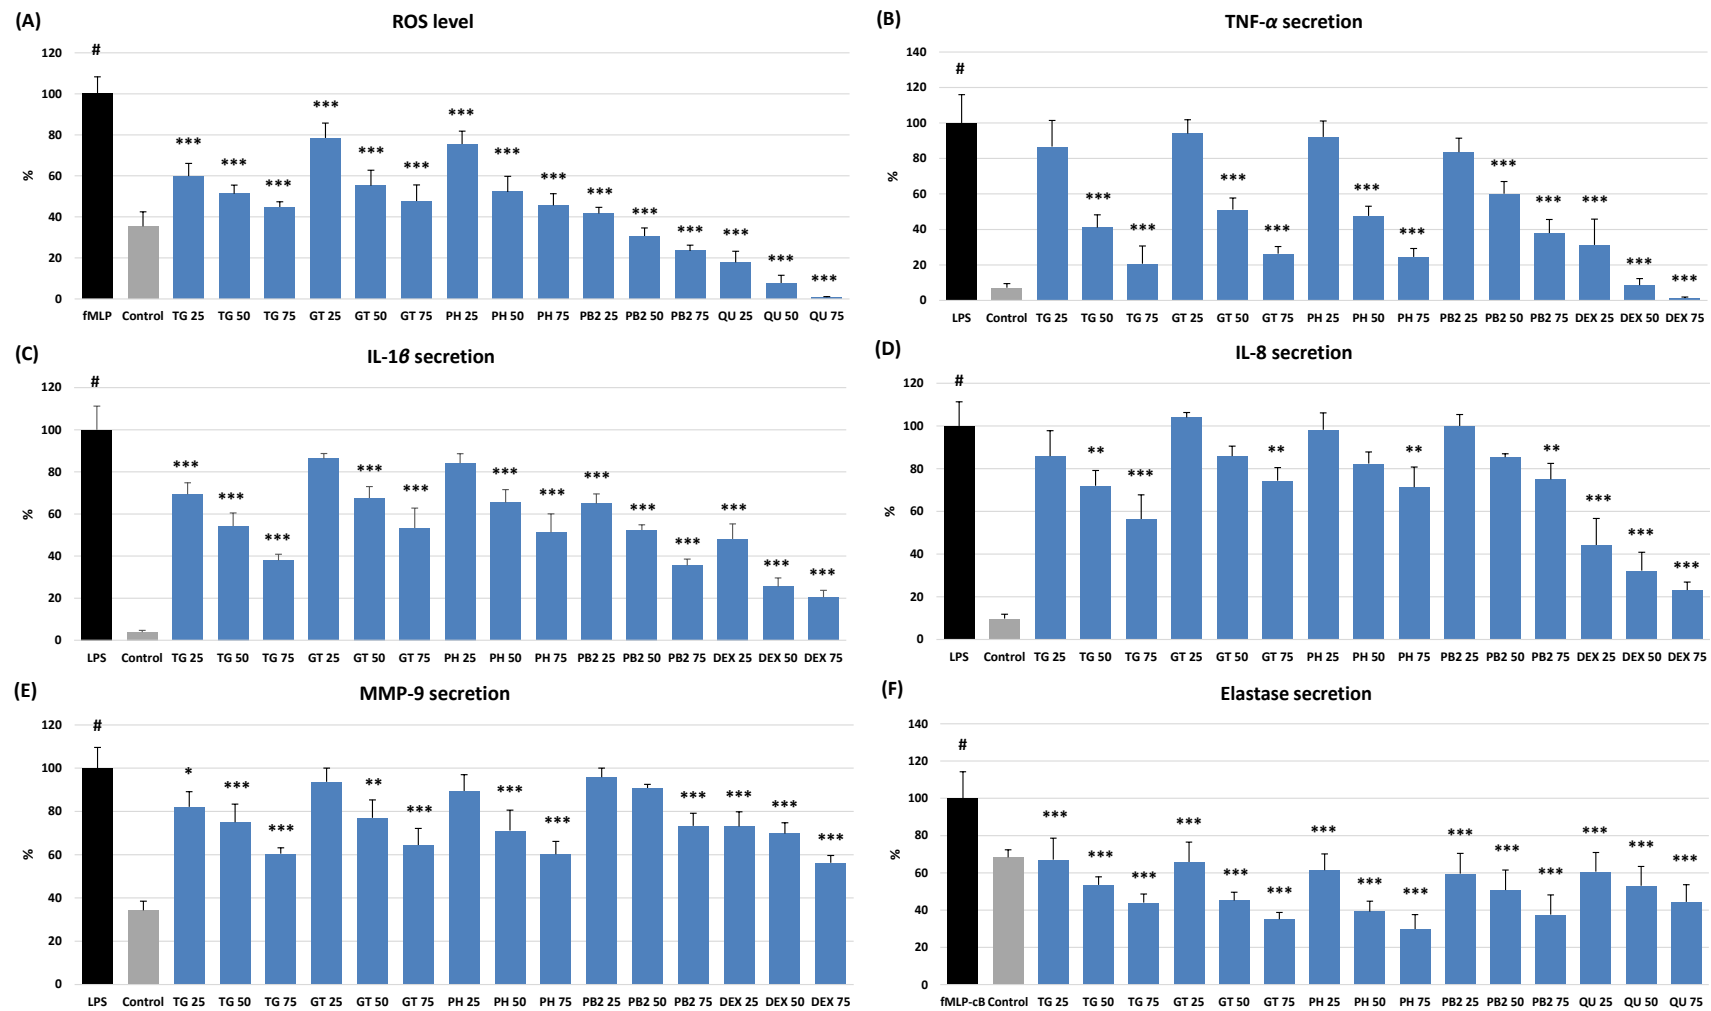

**Fig. S3** Effect of the isolated salicylates (**TG**, **GT** and **PH**) and positive controls (**QU** and **DEX**) at 25, 50, and 75  $\mu$ M on: (A) ROS production, and secretion of (B) TNF- $\alpha$ , (C) IL-1 $\beta$ , (D) IL-8, (E) MMP-9, and (F) ELA-2 by stimulated human neutrophils. Data expressed as means  $\pm$  SD of three independent experiments performed with cells isolated from five independent.
